# Supplementary material for: Solvothermal synthesis of β-tricalcium phosphate porous nanospheres by using organic phosphorus source and their biomedical potentials
Source: Royal Society of Chemistry journal article supplement (doi:10.1039/c5ra01606a), 2015-01-01
Supplement: c5ra01606a1.pdf [file c5ra01606a1.pdf]

## Supporting Information

### Solvothermal synthesis of $\beta$ -tricalcium phosphate porous nanospheres by using organic phosphorus source and their biomedical potentials

Genxing Zhu,<sup>a</sup> Yadong Hu,<sup>ab</sup> Yuling Yang,<sup>a</sup> Ruibo Zhao,<sup>a</sup> and Ruikang Tang<sup>\*ab</sup>

<sup>a</sup> Centre for Biomaterials and Biopathways, Department of Chemistry, Zhejiang University, Hangzhou, China.

Fax: (+)86 571 87953736; Tel: (+)86 571 87953736; E-mail: rtang@zju.edu.cn

<sup>b</sup> Qiushi Academy for Advanced Studies, Zhejiang University, Hangzhou, China.

#### Figures:

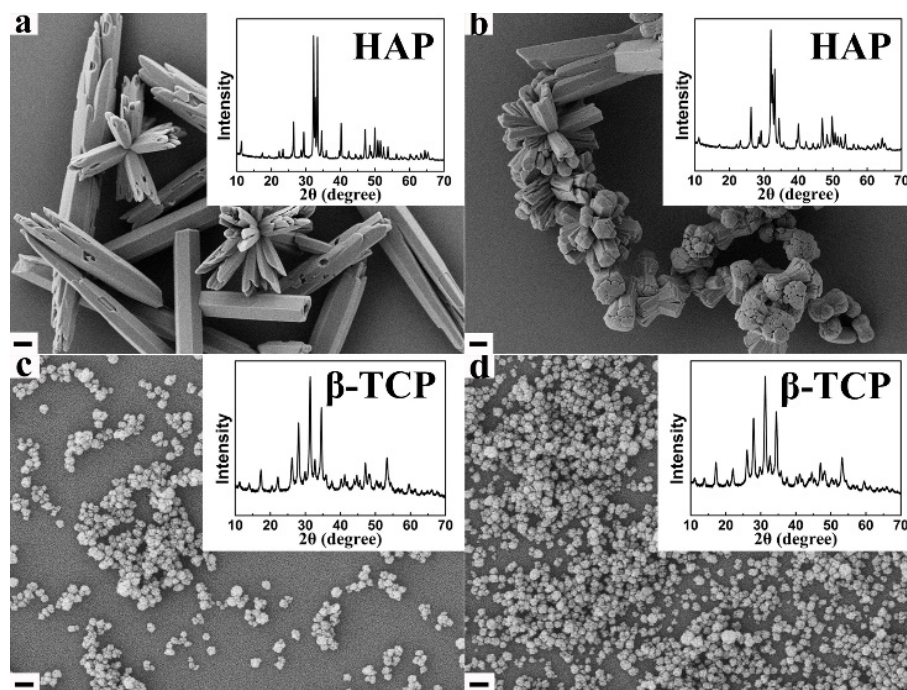

**Figure S1.** SEM images of the samples prepared under different conditions. Different solvents at 200°C for 12 h: (a) DMF-water 1:1 binary solvents (scale bar = 2  $\mu$ m). (b) DMF-water-EG 1:1:1 ternary solvents (scale bar = 2  $\mu$ m). DMF-EG 1:1 binary solvents and different solvothermal temperatures for 12 h: (c) 160°C (scale bar = 200 nm) and (d) 180°C (scale bar = 200 nm). The inserts are the corresponding XRD patterns.

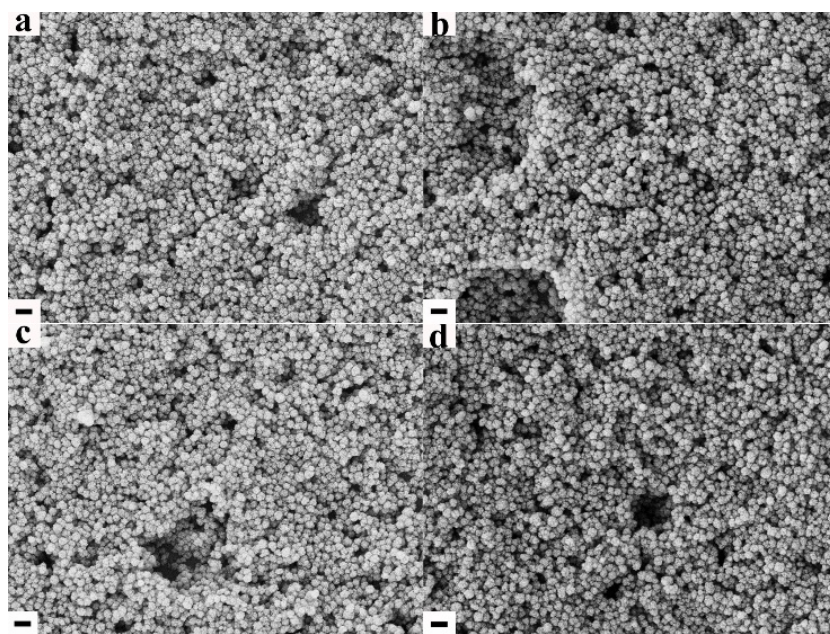

**Figure S2.** SEM images of the samples prepared at 200 °C under different solvothermal times: (a) 4 h; (b) 6 h; (c) 8 h; and (d) 12 h (scale bars=200 nm).
